# Supplementary material
Source: publisher figshare collection journal article supplement (https://gsapubs.figshare.com/ndownloader/files/39478036)
Supplement: Supplementary file 1 [file 39478036]

## Sheet: Sheet1
TABLE S6 ZIRCON LU-HF ISOTOPIC COMPOSITIONS FOR THE MAGMATIC ROCKS FROM THE NORTHERN YILI BLOCK
Grains	176Yb/177Hf	±σ	176Lu/177Hf	±σ	176Hf/177Hf	±σ	T(Ma)	(176Hf/177Hf)i	εHf(t)	±σ	TDM (Ga)	±2σ	TDM C(Ga)	±2σ	ƒLu/Hf
Granidorite
C15YN07-02	0.0275767	0.000341	0.000719093	7.99e-06	0.282665	1.02e-05	352.358	0.28266	3.79222	0.357	0.826049	0.0142906	1.12034	0.015164	-0.981274
C15YN07-03	0.0381184	0.000419	0.000965924	4.52e-06	0.282655	1.05e-05	348.379	0.282649	3.29547	0.3675	0.845556	0.0148025	1.14893	0.0156965	-0.974846
C15YN07-05	0.037836	0.000158	0.000949886	2.23e-06	0.282652	1.19e-05	353.099	0.282646	3.30123	0.4165	0.849142	0.0167675	1.15224	0.0176645	-0.975263
C15YN07-06	0.0396405	0.000154	0.00102802	8.85e-06	0.282677	1.36e-05	355.884	0.28267	4.21315	0.476	0.816153	0.0192143	1.09621	0.0200749	-0.973229
C15YN07-07	0.0238888	0.000194	0.000608918	1.9e-06	0.282672	1.11e-05	355.037	0.282668	4.12016	0.3885	0.814018	0.0155095	1.10149	0.0163694	-0.984143
C15YN07-08	0.0310756	0.000243	0.000843533	6.76e-06	0.282661	1.25e-05	353.357	0.282656	3.65018	0.4375	0.834107	0.0175679	1.13018	0.0184483	-0.978033
C15YN07-09	0.0531518	0.000239	0.00129702	1.11e-05	0.2827	1.29e-05	353.661	0.282692	4.93078	0.4515	0.788713	0.018367	1.04864	0.0191986	-0.966224
C15YN07-10	0.0490845	0.000559	0.00136049	2.13e-05	0.28269	1.03e-05	351.548	0.282681	4.50667	0.3605	0.804745	0.0146864	1.07409	0.0155368	-0.964571
C15YN07-12	0.0285131	0.000391	0.000702381	6.38e-06	0.282648	1.03e-05	350.871	0.282643	3.16236	0.3605	0.849491	0.014418	1.15936	0.0153165	-0.981709
C15YN07-14	0.020803	0.000162	0.000554081	1.19e-06	0.282632	1.09e-05	353.878	0.282628	2.68517	0.3815	0.868916	0.0151925	1.19213	0.0161113	-0.985571
C15YN07-15	0.021846	0.000193	0.00055342	1.23e-06	0.282618	1.12e-05	351.565	0.282615	2.15736	0.392	0.887716	0.0156048	1.22396	0.0165436	-0.985588
C15YN07-16	0.0226098	0.000234	0.000586487	2.88e-06	0.28264	1.11e-05	352.045	0.282636	2.93867	0.3885	0.857794	0.0154877	1.17454	0.0163945	-0.984727
C15YN07-19	0.0212082	0.00027	0.000498104	2.11e-06	0.282644	1.26e-05	351.698	0.282641	3.09331	0.441	0.85024	0.0175418	1.16441	0.0184395	-0.987029
C15YN07-20	0.03518	0.000376	0.00087209	4.67e-06	0.282654	1.41e-05	355.66	0.282648	3.43816	0.4935	0.844864	0.0198273	1.14551	0.0207184	-0.977289
C15YN19-01	0.0268332	0.000156	0.000745578	1.28e-06	0.282685	1.06e-05	347.717	0.28268	4.40438	0.371	0.798154	0.0148691	1.07763	0.0157124	-0.980584
C15YN19-02	0.0248247	0.000114	0.000755767	1.96e-06	0.282651	1.25e-05	355.943	0.282645	3.34779	0.4375	0.847182	0.0175227	1.15149	0.0184171	-0.980319
C15YN19-03	0.0326407	4.94e-05	0.000885109	1e-06	0.282655	1.26e-05	356.006	0.28265	3.49209	0.441	0.843186	0.017725	1.14234	0.0186151	-0.97695
C15YN19-04	0.0255105	0.000306	0.000786074	8.23e-06	0.282644	1.16e-05	351.933	0.282639	3.03836	0.406	0.856417	0.0162715	1.1681	0.0171764	-0.979529
C15YN19-05	0.0264322	0.000575	0.000723489	1.27e-05	0.282656	9.72e-06	345.792	0.282651	3.32388	0.3402	0.839036	0.0136165	1.1451	0.0145042	-0.981159
C15YN19-06	0.0402271	0.000361	0.00108647	5.85e-06	0.282697	1.15e-05	352.764	0.28269	4.85123	0.4025	0.788685	0.0162817	1.05302	0.017114	-0.971706
C15YN19-07	0.0415414	0.000336	0.00105559	4.47e-06	0.282689	1.2e-05	354.42	0.282682	4.60716	0.42	0.799497	0.016972	1.06991	0.0178156	-0.972511
C15YN19-08	0.0281241	0.000289	0.000719762	3.59e-06	0.282633	1.32e-05	352.402	0.282629	2.67464	0.462	0.870325	0.0184781	1.19165	0.019397	-0.981256
C15YN19-09	0.0236197	0.000144	0.000686999	2.51e-06	0.282617	1.32e-05	352.793	0.282612	2.10323	0.462	0.892792	0.0184543	1.22837	0.0193973	-0.982109
C15YN19-10	0.0253276	7.3e-05	0.000855548	1.79e-06	0.282664	1.17e-05	354.549	0.282658	3.76501	0.4095	0.830716	0.01645	1.12378	0.0173273	-0.97772
C15YN19-11	0.0283864	0.00015	0.000849962	3.66e-06	0.282676	1.09e-05	349.502	0.282671	4.09665	0.3815	0.813156	0.0153281	1.09868	0.0161872	-0.977866
C15YN19-12	0.0272786	5.71e-05	0.000741512	3.41e-06	0.282654	1.31e-05	350.558	0.282649	3.34116	0.4585	0.842659	0.0183582	1.14771	0.0192475	-0.98069
C15YN19-13	0.0263427	3.71e-05	0.000708793	3.04e-06	0.282638	1.07e-05	349.39	0.282633	2.7608	0.3745	0.864195	0.0149763	1.18381	0.0158902	-0.981542
C15YN19-14	0.0360068	0.000135	0.000875343	2.65e-06	0.282682	1.33e-05	353.044	0.282676	4.35801	0.4655	0.806102	0.0187176	1.08475	0.0195676	-0.977205
C15YN19-15	0.019832	0.000186	0.000554873	4.58e-06	0.282649	1.29e-05	339.938	0.282646	3.01254	0.4515	0.844114	0.0179883	1.16039	0.0188793	-0.98555
C15YN19-16	0.0335801	0.000214	0.000962396	7.42e-06	0.282639	1.25e-05	345.272	0.282632	2.64931	0.4375	0.868593	0.0176123	1.1877	0.0185297	-0.974938
C15YN19-17	0.0317799	0.000357	0.000845312	1.52e-06	0.282681	1.15e-05	353.815	0.282676	4.36744	0.4025	0.806025	0.0161719	1.08475	0.0170229	-0.977987
C15YN19-18	0.0424643	0.000204	0.00119142	5.98e-06	0.282662	1.18e-05	380.838	0.282654	4.18901	0.413	0.840426	0.0167373	1.11722	0.0176249	-0.968973
C15YN19-19	0.0323093	0.000304	0.000801245	3.67e-06	0.282681	1.3e-05	354.592	0.282675	4.36974	0.455	0.80607	0.0182595	1.08521	0.0191096	-0.979134
Dioritic microgranular enclave
C15YN13-05	0.0373826	0.000584	0.000872206	7.99e-06	0.282674	1.25e-05	352	0.282668	4.06733	0.4375	0.816731	0.017587	1.1025	0.0184488	-0.977286
C15YN13-07	0.0378353	0.000207	0.000888298	1.75e-06	0.282675	1.5e-05	352	0.282669	4.09897	0.525	0.815671	0.0211132	1.10048	0.0219726	-0.976867
C15YN13-10	0.0716926	0.00103	0.00189727	6e-06	0.282639	1.62e-05	352	0.282627	2.59675	0.567	0.889788	0.0233996	1.1963	0.024338	-0.950592
C15YN13-13	0.0226319	9.72e-05	0.000894436	2.66e-06	0.282633	1.46e-05	352	0.282627	2.59693	0.511	0.875471	0.0205307	1.19629	0.0214544	-0.976707
C15YN13-20	0.0423256	0.00018	0.00155676	3.51e-06	0.282659	1.52e-05	352	0.282648	3.36626	0.532	0.853708	0.0217673	1.14724	0.0226673	-0.959459
Granitic porphyry
N15JH19-1	0.103589	0.00136401	0.00205746	1.67106e-05	0.282695	1.31051e-05	312.1	0.282683	3.69326	0.45868	0.813283	0.0190407	1.09525	0.0198983	-0.94642
N15JH19-2	0.0996769	0.00166724	0.00194529	1.80708e-05	0.282582	1.34779e-05	306.3	0.282571	-0.388227	0.471726	0.973667	0.0194636	1.35053	0.0204929	-0.949341
N15JH19-3	0.0917089	0.000928758	0.00184118	1.01157e-05	0.282738	1.58089e-05	303.5	0.282728	5.1099	0.553311	0.745149	0.0228614	0.998063	0.0236449	-0.952052
N15JH19-4	0.0854673	0.000386684	0.00156262	1.07112e-05	0.282793	1.58885e-05	315	0.282784	7.35273	0.556099	0.660581	0.0228388	0.86348	0.0235317	-0.959307
N15JH19-5	0.0580414	0.000319275	0.00115858	1.92839e-06	0.282794	1.44196e-05	311.5	0.282787	7.38543	0.504686	0.652536	0.0205059	0.858655	0.0211908	-0.969829
N15JH19-6	0.0859373	0.000879981	0.00161494	1.40975e-05	0.282628	1.31177e-05	305.5	0.282619	1.28559	0.459121	0.899276	0.0187996	1.24351	0.0197494	-0.957944
N15JH19-7	0.0777741	0.00153512	0.00152421	2.61228e-05	0.282518	1.41946e-05	315.8	0.282509	-2.37557	0.496812	1.05428	0.020234	1.48401	0.0213494	-0.960307
N15JH19-8	0.0732971	0.000910986	0.00150081	1.23859e-05	0.282796	1.20736e-05	304.7	0.282787	7.23578	0.422576	0.65595	0.0173284	0.862943	0.0180181	-0.960916
N15JH25-1	0.121676	0.00125662	0.00228566	1.01845e-05	0.282859	1.24588e-05	314.6	0.282846	9.519	0.436059	0.577301	0.0182965	0.724149	0.0189016	-0.940478
N15JH25-2	0.0632999	0.000784446	0.00111992	8.51855e-06	0.282714	8.51935e-06	314.9	0.282704	4.63973	0.298177	0.765216	0.0120782	0.930388	0.0128877	-0.970835
N15JH25-3	0.133062	0.00158721	0.0022659	2.13094e-05	0.282715	1.24746e-05	318.8	0.282702	4.50981	0.43661	0.788116	0.0182378	1.05042	0.0190687	-0.940992
N15JH25-4	0.0932107	0.000647043	0.00155109	1.0614e-05	0.282634	1.23633e-05	315	0.282622	1.72416	0.432715	0.88859	0.0176914	1.17277	0.0186301	-0.959607
N15JH25-5	0.0741551	0.000874581	0.00124918	9.66409e-06	0.28262	1.03137e-05	312.9	0.282612	1.22901	0.360981	0.902027	0.0146354	1.24953	0.01559	-0.967469
N15JH25-6	0.0786213	0.000919537	0.00134065	1.66073e-05	0.28265	1.32103e-05	315.1	0.282638	2.32214	0.46236	0.861383	0.0188054	1.09453	0.0197146	-0.965087
N15JH25-7	0.0627322	0.000554219	0.00114645	3.78356e-06	0.282824	1.04978e-05	317.1	0.282817	8.56936	0.367423	0.60963	0.0149367	0.788319	0.0155779	-0.970144
N15JH25-8	0.0944532	0.00587274	0.00204877	0.000129856	0.282578	1.20823e-05	316.7	0.282564	-0.325651	0.422881	0.981795	0.0174956	1.32054	0.0185343	-0.946647
N15JH25-9	0.0403031	0.00128792	0.000685766	2.00722e-05	0.282792	1.01381e-05	315.6	0.282788	7.51769	0.354834	0.646539	0.014239	0.855007	0.0149201	-0.982142
N15JH25-10	0.0975	0.00157005	0.00187073	2.59758e-05	0.282552	1.13092e-05	314.2	0.282536	-1.27371	0.395823	1.01506	0.0162864	1.3395	0.0173613	-0.951283
N15JH25-11	0.0189157	0.000398251	0.000348816	6.20686e-06	0.282624	1.06023e-05	313.8	0.282622	1.57337	0.371079	0.875442	0.0146961	1.23089	0.0156222	-0.990916
N15JH25-12	0.0865662	0.00183725	0.0015816	3.79651e-05	0.282569	9.72708e-06	314.6	0.282558	-0.614674	0.340448	0.983306	0.0139065	1.33887	0.0149486	-0.958812
